# Supplementary material for: Mir-153-3p Modulates the Breast Cancer Cells’ Chemosensitivity to Doxorubicin by Targeting KIF20A
Source: MDPI journal article supplement (doi:10.3390/cancers15061724), 2023-03-11
Supplement: s1 [file s1]

# Mir-153-3p Modulates the Breast Cancer Cells' Chemosensitivity to Doxorubicin by Targeting KIF20A

## Western blots details

Figure 3: MCF-7 Cell line.

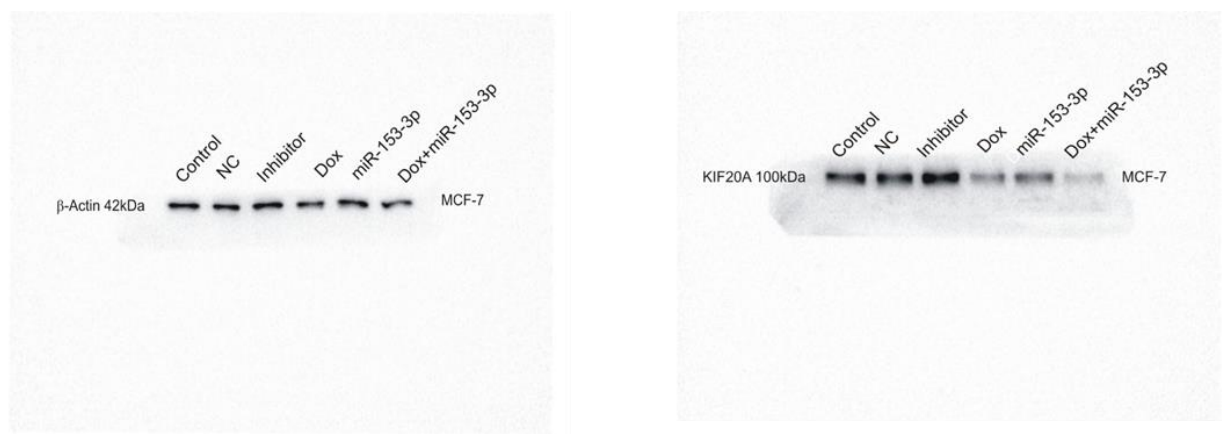

| KIF20A (MCF-7)                     |        |
|------------------------------------|--------|
| KIF20A/β-Actin Ratio in percentage |        |
| Control                            | 100    |
| NC                                 | 98.89  |
| Inhibitor                          | 122.37 |
| Dox                                | 52.94  |
| miR-153-3p                         | 59.54  |
| Dox+miR-153-3p                     | 37.68  |

**Figure 3: MDA-MB-231 Cell line.**

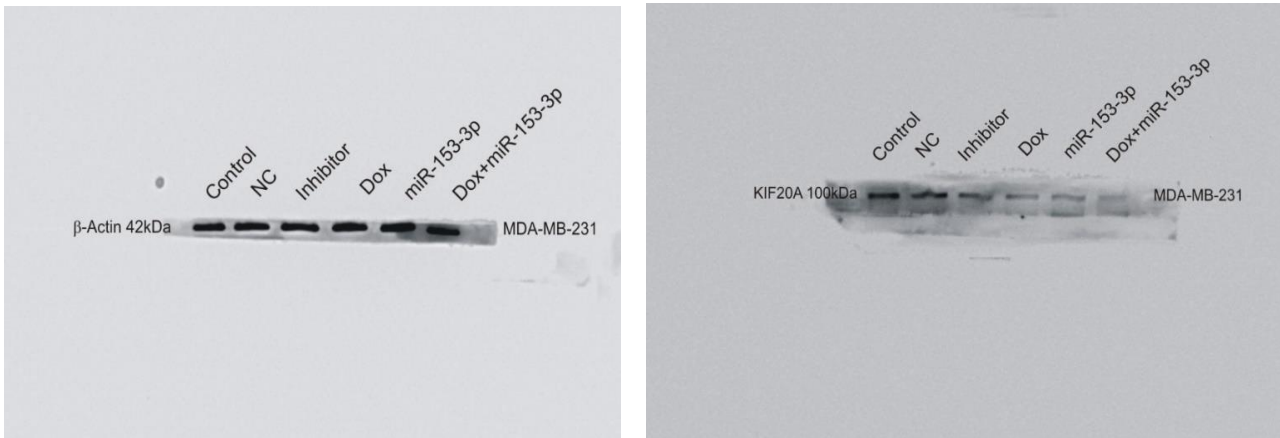

| KIF20A (MDA-MB-231)                |          |
|------------------------------------|----------|
| KIF20A/β-Actin Ratio in percentage |          |
| Control                            | 100      |
| NC                                 | 86.5695  |
| Inhibitor                          | 82.60747 |
| Dox                                | 54.0817  |
| miR-153-3p                         | 42.9246  |
| Dox+miR-153-3p                     | 36.4982  |

**Figure 4:**

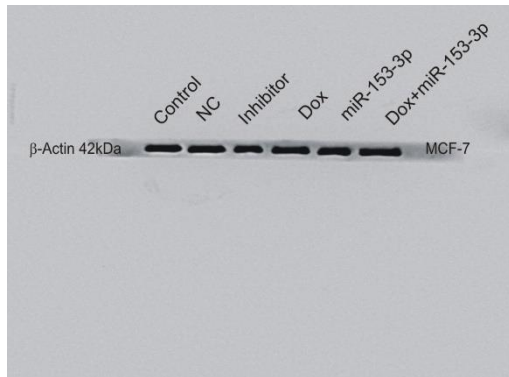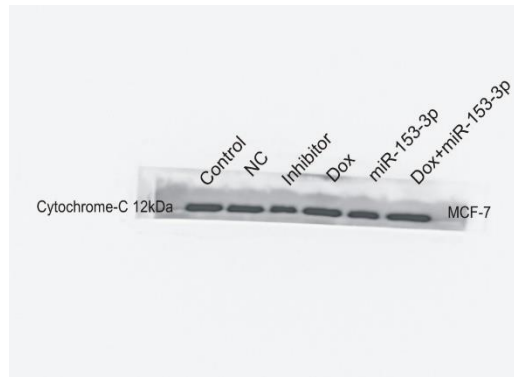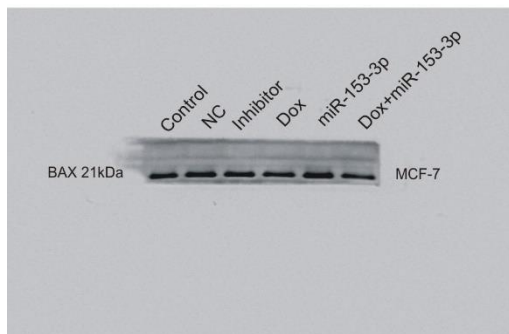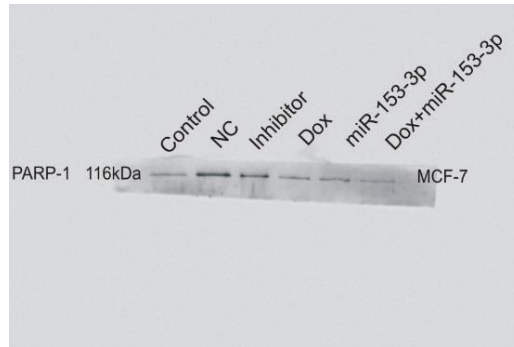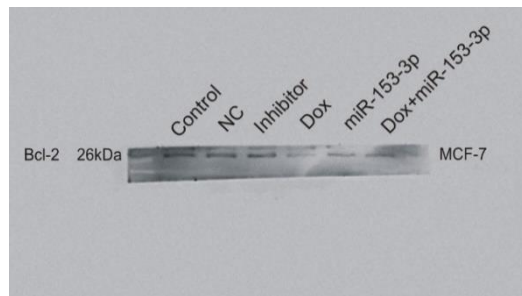

| <b>Cytochrome-C (MCF-7)</b>                       |         |
|---------------------------------------------------|---------|
| Cytochrome-C / $\beta$ -Actin Ratio in percentage |         |
| Control                                           | 100     |
| NC                                                | 106.91  |
| Inhibitor                                         | 104.709 |
| Dox                                               | 113.27  |
| miR-153-3p                                        | 120.82  |
| Dox+miR-153-3p                                    | 127.66  |

| <b>BAX (MCF-7)</b>                       |             |
|------------------------------------------|-------------|
| BAX / $\beta$ -Actin Ratio in percentage |             |
| Control                                  | 100         |
| NC                                       | 91.2528     |
| Inhibitor                                | 91.8334     |
| Dox                                      | 92.6008     |
| miR-153-3p                               | 105.5758333 |
| Dox+miR-153-3p                           | 97.6096     |

| <b>PARP1 (MCF-7)</b>                      |        |
|-------------------------------------------|--------|
| PARP1/ $\beta$ -Actin Ratio in percentage |        |
| Control                                   | 100    |
| NC                                        | 109.03 |
| Inhibitor                                 | 109.12 |
| Dox                                       | 94.51  |
| miR-153-3p                                | 64.88  |
| Dox+miR-153-3p                            | 49.90  |

| <b>Bcl-2 (MCF-7)</b>                      |       |
|-------------------------------------------|-------|
| Bcl-2/ $\beta$ -Actin Ratio in percentage |       |
| Control                                   | 100   |
| NC                                        | 78.85 |
| Inhibitor                                 | 71.44 |
| Dox                                       | 22.53 |
| miR-153-3p                                | 15.57 |
| Dox+miR-153-3p                            | 4.51  |

**Figure 5:**

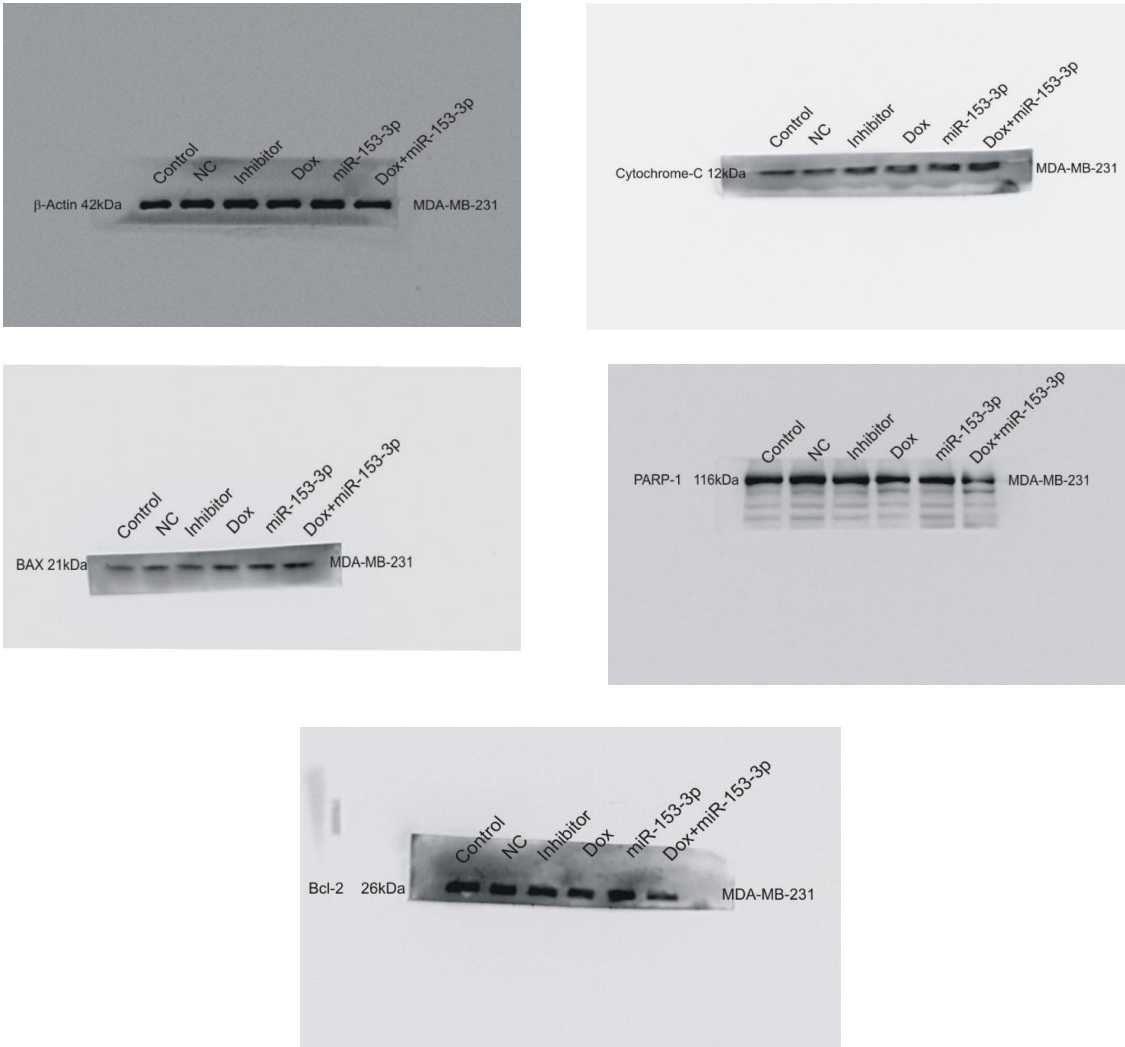

| Cytochrome-C (MDA-MB-231)                         |       |
|---------------------------------------------------|-------|
| Cytochrome-C / $\beta$ -Actin Ratio in percentage |       |
| Control                                           | 100   |
| NC                                                | 81.41 |
| Inhibitor                                         | 84.7  |
| Dox                                               | 97.71 |
| miR-153-3p                                        | 111.5 |
| Dox+miR-153-3p                                    | 122.5 |

| BAX (MDA-MB-231)                         |       |
|------------------------------------------|-------|
| BAX / $\beta$ -Actin Ratio in percentage |       |
| Control                                  | 100   |
| NC                                       | 138.5 |
| Inhibitor                                | 119.9 |
| Dox                                      | 169.1 |
| miR-153-3p                               | 174.8 |
| Dox+miR-153-3p                           | 180.1 |

| PARP1 (MDA-MB-231)                        |       |
|-------------------------------------------|-------|
| PARP1/ $\beta$ -Actin Ratio in percentage |       |
| Control                                   | 100   |
| NC                                        | 82.12 |
| Inhibitor                                 | 87.5  |
| Dox                                       | 52.5  |
| miR-153-3p                                | 46.7  |
| Dox+miR-153-3p                            | 35.9  |

| Bcl-2 (MDA-MB-231)                        |      |
|-------------------------------------------|------|
| Bcl-2/ $\beta$ -Actin Ratio in percentage |      |
| Control                                   | 100  |
| NC                                        | 86.9 |
| Inhibitor                                 | 81.9 |
| Dox                                       | 57.2 |
| miR-153-3p                                | 75.9 |
| Dox+miR-153-3p                            | 42.5 |

**Figure 8:**

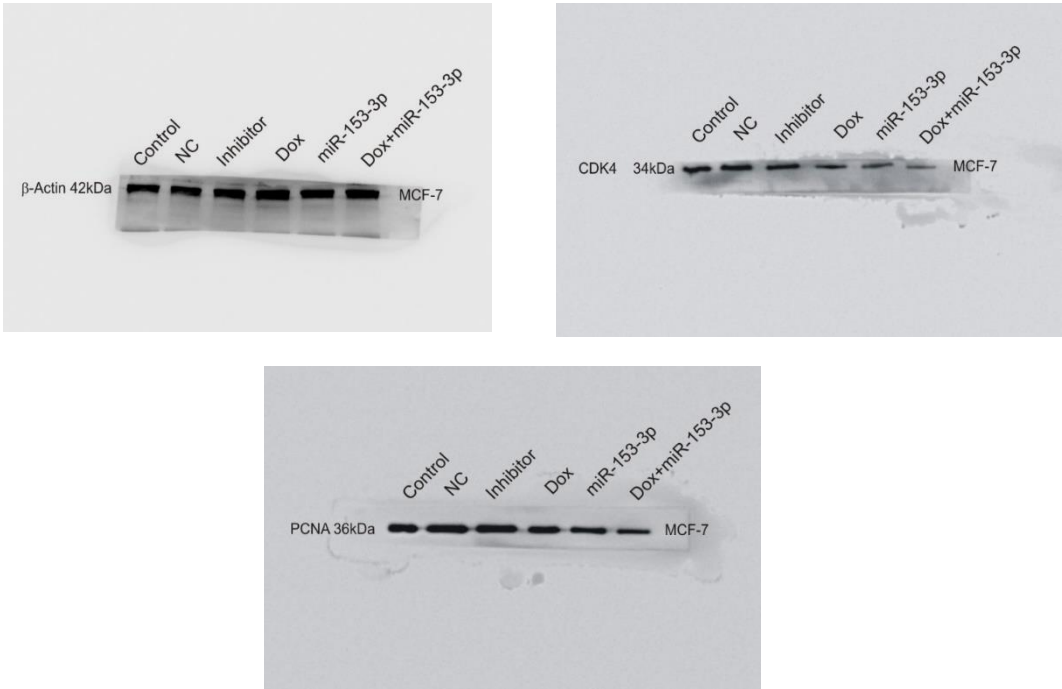

| CDK4 (MCF-7)                             |          |
|------------------------------------------|----------|
| CDK4/ $\beta$ -Actin Ratio in percentage |          |
| Control                                  | 100      |
| NC                                       | 78.98945 |
| Inhibitor                                | 86.57644 |
| Dox                                      | 58.49403 |
| miR-153-3p                               | 77.99591 |
| Dox+miR-153-3p                           | 53.93176 |

| PCNA (MCF-7)                              |          |
|-------------------------------------------|----------|
| PCNA / $\beta$ -Actin Ratio in percentage |          |
| Control                                   | 100      |
| NC                                        | 119.2648 |
| Inhibitor                                 | 115.6589 |
| Dox                                       | 81.85907 |
| miR-153-3p                                | 70.72523 |
| Dox+miR-153-3p                            | 64.5823  |

**Figure 9:**

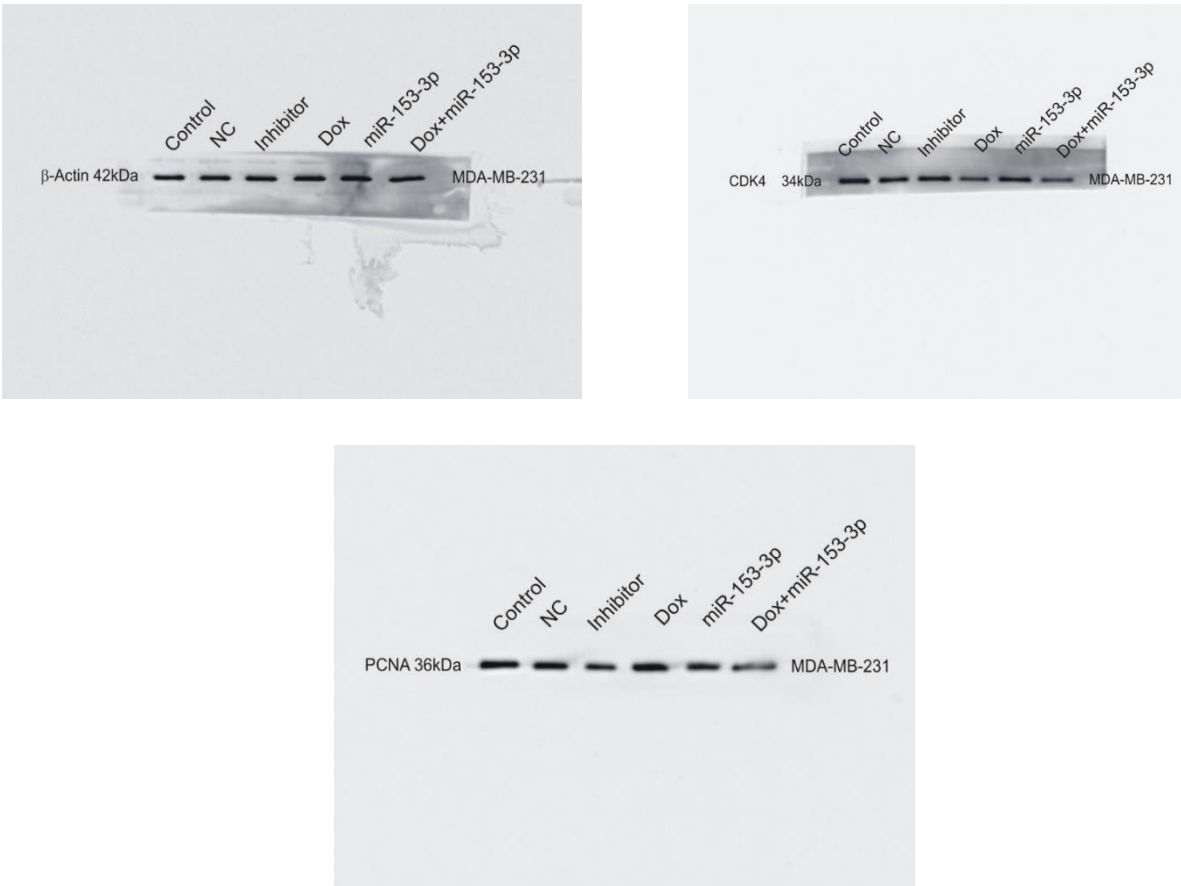

| CDK4 (MDA-MB-231)                        |        |
|------------------------------------------|--------|
| CDK4/ $\beta$ -Actin Ratio in percentage |        |
| Control                                  | 100    |
| NC                                       | 109.40 |
| Inhibitor                                | 110.26 |
| Dox                                      | 91.7   |
| miR-153-3p                               | 74.38  |
| Dox+miR-153-3p                           | 58.06  |

| PCNA (MDA-MB-231)                         |      |
|-------------------------------------------|------|
| PCNA / $\beta$ -Actin Ratio in percentage |      |
| Control                                   | 100  |
| NC                                        | 95.8 |
| Inhibitor                                 | 93.5 |
| Dox                                       | 95.6 |
| miR-153-3p                                | 74.4 |
| Dox+miR-153-3p                            | 65.5 |

**Figure 10: MCF-7 Cell line**

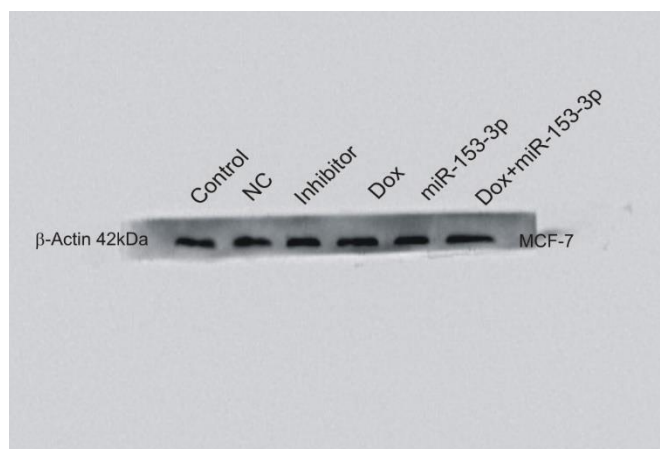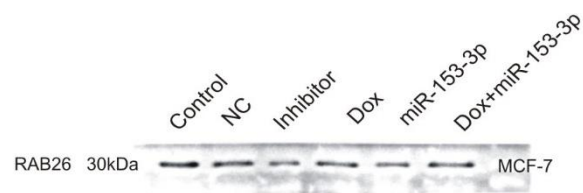



| RAB26 (MCF-7)                             |          |
|-------------------------------------------|----------|
| RAB26/ $\beta$ -Actin Ratio in percentage |          |
| Control                                   | 100      |
| NC                                        | 122.1881 |
| Inhibitor                                 | 103.5713 |
| Dox                                       | 84.7789  |
| miR-153-3p                                | 85.5201  |
| Dox+miR-153-3p                            | 75.9411  |

**Figure 10: MDA-MB-231 Cell line**

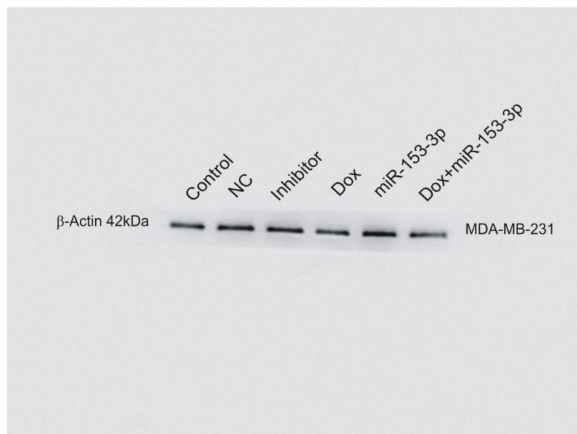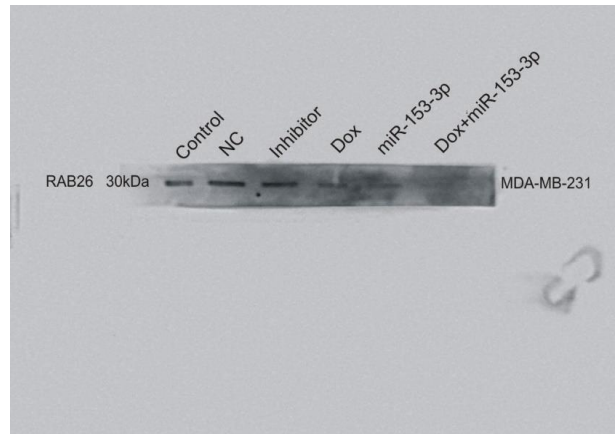

| RAB26 (MDA-MB-231)                        |          |
|-------------------------------------------|----------|
| RAB26/ $\beta$ -Actin Ratio in percentage |          |
| Control                                   | 100      |
| NC                                        | 115.5818 |
| Inhibitor                                 | 99.6     |
| Dox                                       | 47.8     |
| miR-153-3p                                | 77.2     |
| Dox+miR-153-3p                            | 37.3     |
